# Supplementary material for: Analysis of transcriptome in hickory (Carya cathayensis), and uncover the dynamics in the hormonal signaling pathway during graft process
Source: PubMed Central journal article supplement (PMC5114764; doi:10.1186/s12864-016-3182-4), 2016-11-17

Figure S1 The information of gene function classification (GO) analysis

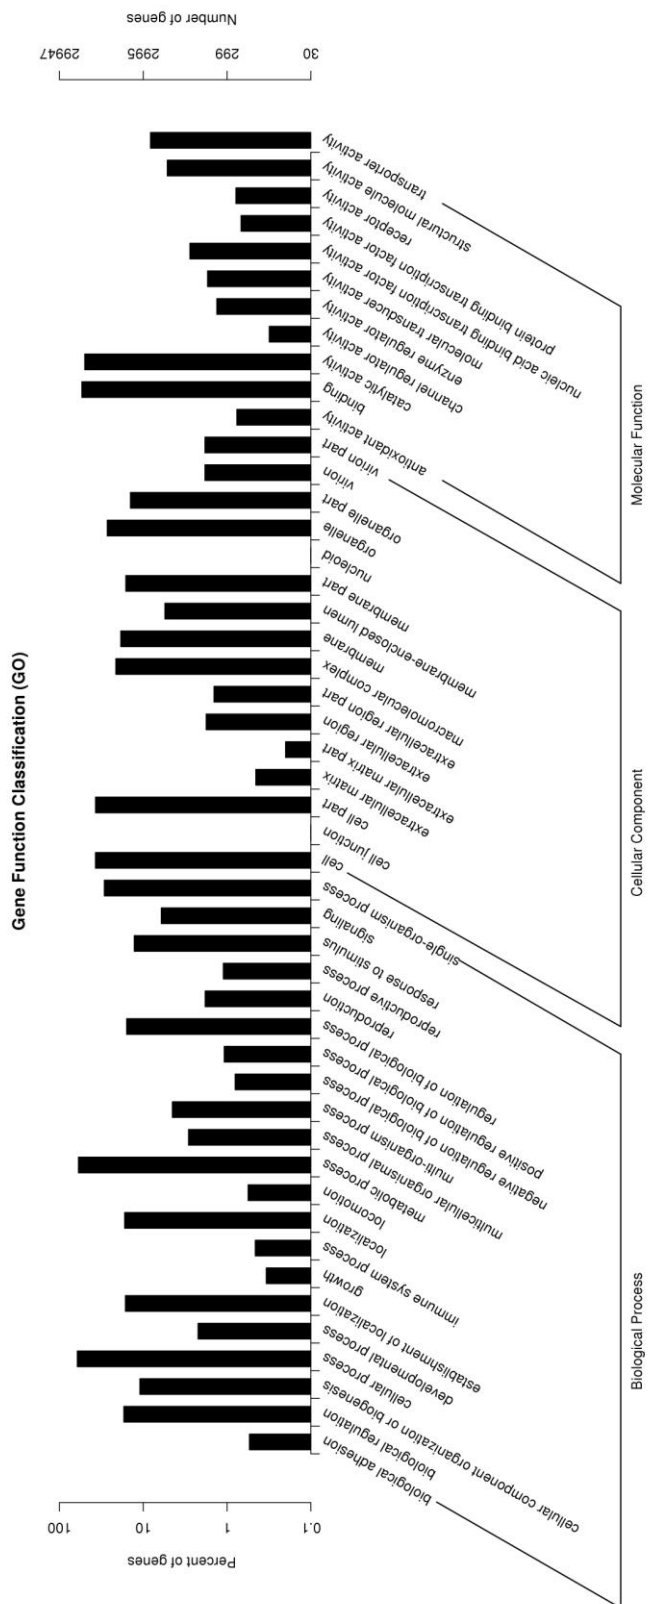

Supplement: 12864_2016_3182_MOESM4_ESM.pdf [file 12864_2016_3182_MOESM4_ESM.pdf]
